# Supplementary figures and images for: Exploring conformational landscapes and binding mechanisms of convergent evolution for the SARS-CoV-2 spike Omicron variant complexes with the ACE2 receptor using AlphaFold2-based structural ensembles and molecular dynamics simulations
Source: Royal Society of Chemistry journal article supplement (doi:10.1039/d4cp01372g), 2024-01-01

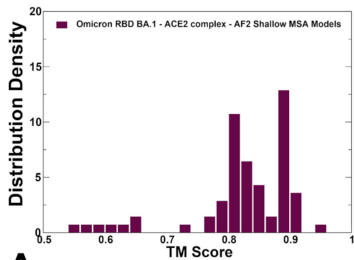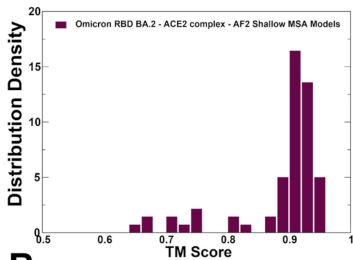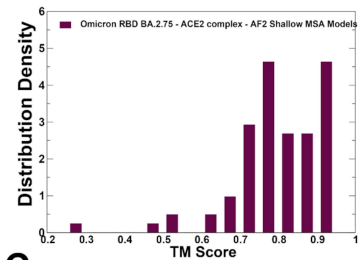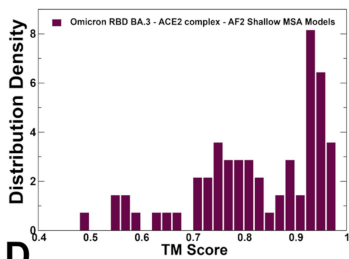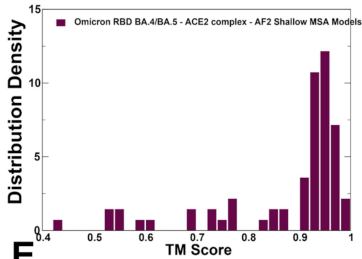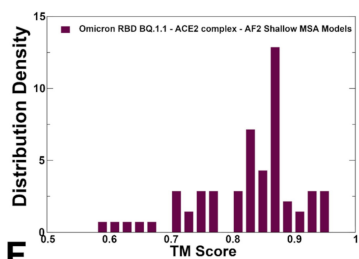

Supplement: d4cp01372g2.pdf [file d4cp01372g2.pdf]

**BA.1**

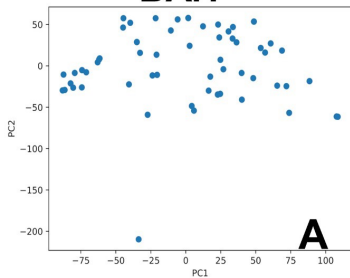

**BA.2**

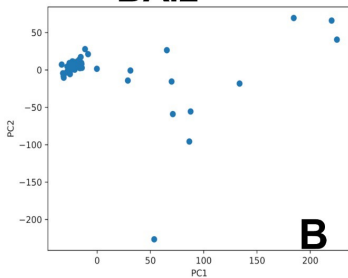

**BA.2.75**

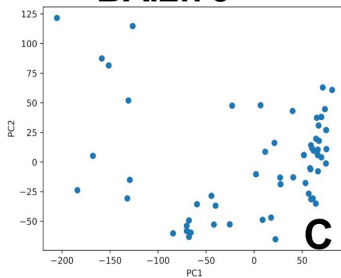

**BA.3**

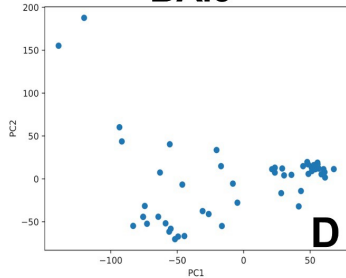

**BA.4/BA.5**

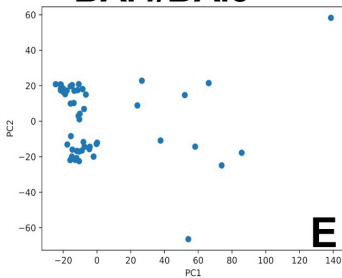

**BQ.1.1**

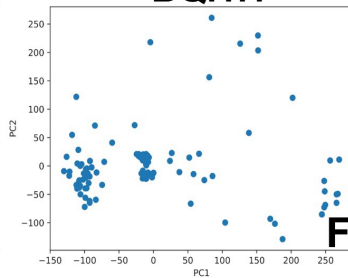

Supplement: d4cp01372g3.pdf [file d4cp01372g3.pdf]

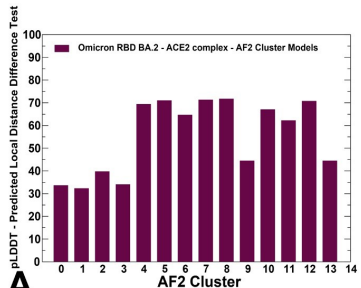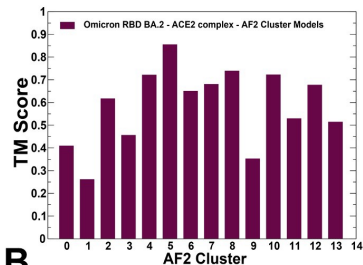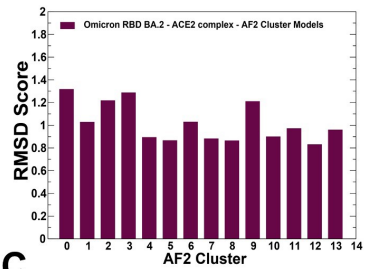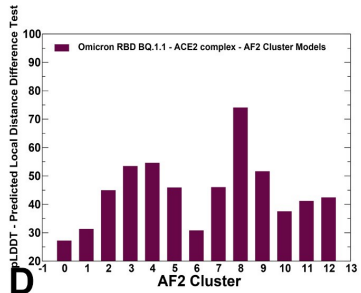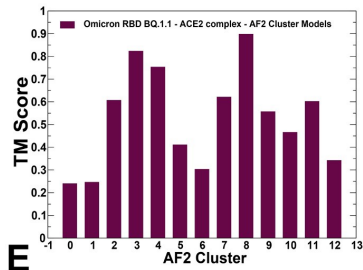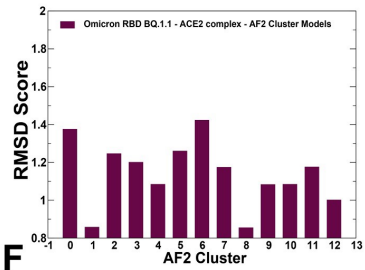

Supplement: d4cp01372g4.pdf [file d4cp01372g4.pdf]

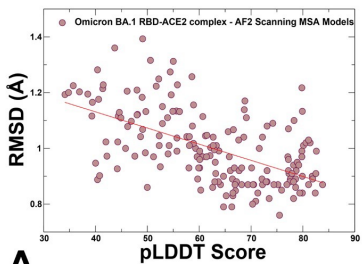

**A**

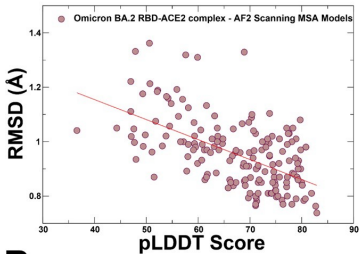

**B**

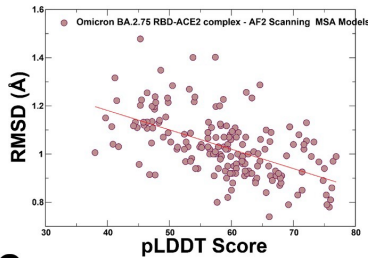

**C**

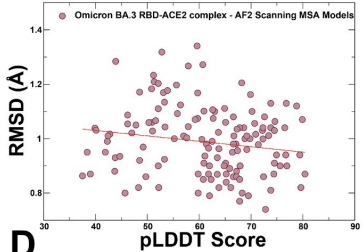

**D**

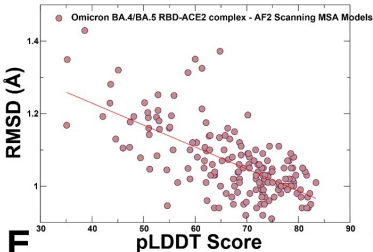

**E**

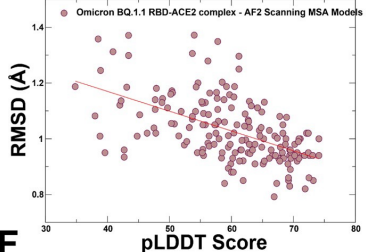

**F**

Supplement: d4cp01372g5.pdf [file d4cp01372g5.pdf]

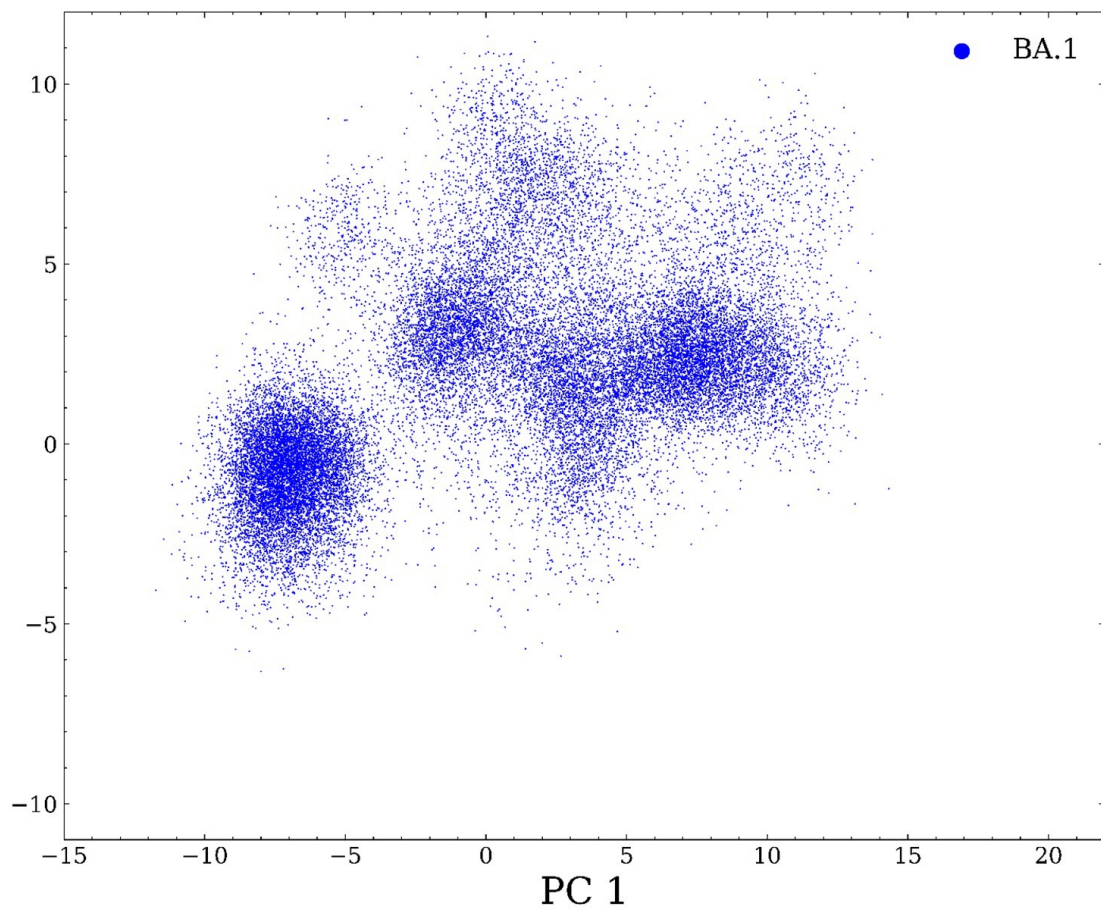

**A**

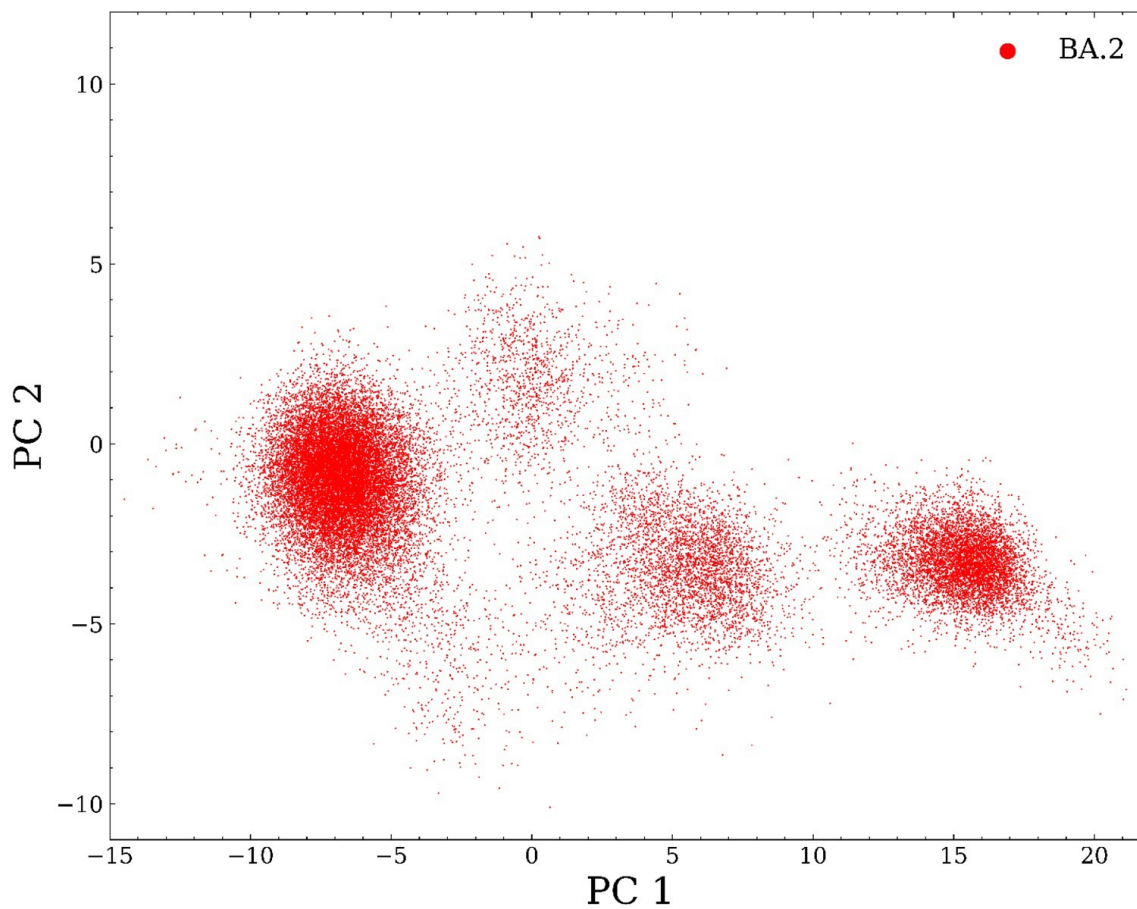

**B**

Supplement: d4cp01372g6.pdf [file d4cp01372g6.pdf]
